# Supplementary material for: Continuous Once-Through Electrooxidation Treatment using Mixed Metal Oxide Anode for Bacterial Disinfection
Source: Research Square preprint supplement (doi:10.21203/rs.3.rs-6706217/v1), 2025-06-23
Supplement: Supplementary file 1 [file c63f9bb40cfc5011fd8a9181.docx]

**Table 1:** Cost estimation and energy consumption at optimized condition of (current density = 7.14 mA/cm2, NaCl dose = 0.2 g/ L, treatment time = 9 min, flow rate = 40 mL/min) for bacterial inactivation in simulated wastewater

| **Time (min)** | **Current density (mA/cm2)** | **% Inactivation** | **Energy consumption (kWh/m3)** | **Running cost $/m3** |
| --- | --- | --- | --- | --- |
| 0 | 7.14 | 0 | 0 | 0 |
| 2 | 7.14 | 9 | 0.03 | 0.188 |
| 3 | 7.14 | 12 | 0.05 | 0.18870 |
| 5 | 7.14 | 31 | 0.08 | 0.18874 |
| 9 | 7.14 | 96 | 0.17 | 0.18887 |

**Table 2:** Comparison table with other techniques

| **Wastewater** | **Microbe** | **Technique used** | **Removal efficiency** | **Current density** | **Cost** | **References** |
| --- | --- | --- | --- | --- | --- | --- |
| Synthetic water  Distilled water  Synthetic feed water  Drinking water  Simulated bacterial wastewater | *Escherichia coli K-12*  *Escherichia coli*  *Escherichia coli*  *Coliform bacteria, Streptococci*  *Escherichia coli*, *Bacillus subtilis*, *Staphylococcus aureus*, *Salmonella enterica*, *Acinetobacter calcoacetius*, *Serratia marcescens, Listeria sp.*, *Enterococcus faecalis* | Photo-fenton and photocatalysis  Solar disinfection  Electrochemical dynamic  membrane filtration system  Charcoal column filtration followed by UV- irradiation  Electrooxidation through MMO anodes | 4 log reduction at 150 min  4 log reduction at 240 min  100% log removal  95% bacterial removal  96% inactivation of bacteria | UV-light source  UV-light source  75L/(m2h) at 2.0V  -  7.14 mA/cm2 | 16.01$  -  30 $  125 $  0.18 $/m3 | 58  59  60  61  Present study |
