# Supplementary material for: Continuous Once-Through Electrooxidation Treatment using Mixed Metal Oxide Anode for Bacterial Disinfection
Source: Research Square preprint supplement (doi:10.21203/rs.3.rs-6706217/v1), 2025-06-23
Supplement: Supplementary file 2 [file e456f0a386313682c055c6cc.docx]

**Supplementary Information**

**Table S1. Evaluation of tentative operating cost of EO process for bacterial inactivation in sewage wastewater**

| Electrical energy consumed for treating bacteria with MMO = 0.1840 kWh/m3 |
| --- |
| Price of electricity in Punjab = 0.070 $/kWh |
| Price of electricity consumption = 0.070* 0.1840 = 0.012 $/ m3 |
| Price of one MMO anode used = 9.43 $ |
| Total price of MMO anode = 9.43+ 0.012 = 9.442 $ |
| Cost of 500 g NaCl = 1.82 $ |
| Cost of 0.44 g NaCl = 0.0016 $ |
| Total cost of MMO for removal of bacteria = 9.442 + 0.0016 = 9.4436 $/ m3 |
| Total runs = 5 |
| Cost of one run = 9.4436/5 = 1.8887 $/ m3 |
| Total operating cost for per run of bacterial inactivation = 1.8887 $/m3 |
